# Supplementary material
Source: publisher site journal article supplement (https://www.dovepress.com/article/408857)
Supplement: Supplementary file 1 [file get_supplementary_file.php]

## Supplementary Material 1

## Patient Questionnaire

**General Demographic Details - Patients**

1. Please select your age category:

<40 years old

41-50 years old

51-60 years old

61-70 years old

71-80 years old

>81 years old

1. Please select your sex:

Male Female Prefer not to say

1. Please select your ethnicity:

White

Mixed/multiple ethnic groups

Asian

Black/African/Caribbean

Hispanic/Mediterranean

Other ethnic group (please specify)

1. Please select your highest attained education level:

Primary education (primary school)

Secondary education (up to, but not including university)

Higher education (universities and other higher education institutions)

1. Are you?

Living alone

Living with partner/spouse without children

Living with partner/spouse with children

Living with children

Living in a residency with health support (hospital, elderly care, at home with a caregiver)

Living in a situation not listed

**Clinical Details**

1. How many years have passed since you were first told by a hospital doctor that you had IPF?

[drop down list of years]

1. How many hours per day do you spend outside your home on average?

Less than 1 hour

1 to 3 hours

Over 3 hours

1. In the past 4 weeks how much has shortness of breath stopped you from doing the things you want to do?

Not at all Sometimes Often All the time

1. How often has coughing stopped you from doing normal activities?

Not at all Sometimes Often All the time

1. How severe do you believe your disease is? I think my disease is…:

Mild Moderate Severe

1. Aside from you, who helped you choose your IPF medicine? (Select all that apply):

Pulmonologist/Respiratory Doctor

Nurse

Spouse/partner

Family member

Friend

Patient association

Professional caregiver

Internet search

Other (please specify)

1. How well informed do you feel about all available treatments in IPF?

1 2 3 4 5

Not informed at all Very well informed

1. How well informed do you feel about your current IPF treatment (dosing, number of pills to take, how often you need to take your pills, how well the medicine works, side-effects that may occur and how to manage these, what to expect from the treatment)?

1 2 3 4 5

Not informed at all Very well informed

1. Where do you receive information on the disease and treatment (dropdown):

Pulmonologist/Respiratory Doctor

Family doctor

Nurse

Patient association

Professional caregiver

Internet search

Other (please specify)

**IPF Medication and Other therapy**

1. Are you currently taking an antifibrotic medication for your IPF?

Yes No Don’t know

1. [Conditional on 15] If no, did you ever take medication for your IPF?

Yes No

1. [Conditional on 16] Why did you stop taking medication for your IPF? Please check all that apply.

Side effects

Doctor decided it was best to change/stop

Dosing schedule too complicated

Struggled to take medication

You no longer wanted to take the medication

I do not take any medication at the moment

My physician believed another strategy would provide more clinical benefits

Other

1. [Conditional on 15] If yes, for how long have been taking your current IPF medicines?

[dropdown list of months/years]

1. [Conditional on 15] What medication are you taking for your IPF (dropdown)?

Nintedanib 150mg tablets

Nintedanib 100mg tablets

Pirfenidone 267mg tablets

Pirfenidone 534mg tablets

Pirfenidone 801mg tablets

Other (please specify)

1. [Conditional on 15] How many tablets do you take a day?

[drop down list of numbers 1-12]

1. What other non-drug therapies or other support are you receiving? Please select (all that apply):

Oxygen therapy

Pulmonary rehabilitation

Nutritional support

Psychological support

Social Worker support

Smoking cessation program

Physical therapy at your local hospital or clinic

Other

1. Have you been told by your doctor (family practitioner or hospital specialist) or pharmacist not to take certain other food or drinks, because of your IPF medicines?

Yes No Don’t know

1. Have you been told by your doctor (family practitioner or hospital specialist) or pharmacist not to take certain other medicines, because of your IPF medicines?

Yes No Don’t know

1. [Conditional on 15 and cannot select same answer as 19] Were you taking a different antifibrotic medicine for your IPF before your current IPF medication? If so, what was it?

No, I did not take any medication before

Nintedanib

Pirfenidone

Other (please specify)

1. [Conditional on 24] Thinking about your previous IPF medicines, what was/were the reason(s) for changing to your current IPF medication? Please check all that apply.

Side effects

Doctor decided it was best to change/stop

Dosing schedule too complicated

Struggled to take medication

You no longer wanted to take the medication

I do not take any medication at the moment

My physician believed another strategy would provide more clinical benefits Other

**Side Effects**

1. Are you experiencing any side effects from your current IPF medication?

Yes No

1. Do you have to limit your exposure to the sun or protect your skin due to your IPF treatment?

Never Sometimes Often

1. Do you consider taking medications against diarrhoea?

Never Sometimes Often

1. Do you consider taking medications against nausea/vomiting?

Never Sometimes Often

1. Do you consider taking medications against heartburn/reflux?

Never Sometimes Often

**Other Medication**

1. What other prescribed medication(s) beyond your IPF medication are you taking? Please enter these in the field [free text field]

**Adherence**

Please answer each question based on your personal experience with your IPF medications.

There is no right or wrong answer.

1. Do you sometimes forget to take your IPF medication?

Yes No

1. When you travel or leave home, do you sometimes forget to bring along your IPF medication?

Yes No

1. When you feel like your symptoms are under control, do you sometimes stop taking your IPF medication?

Yes No

1. Taking medication every day can be a real inconvenience for some people. Do you ever feel hassled about sticking to your treatment plan?

Yes No

1. How often do you have difficulty remembering to take all your medication?

Never or rarely

Once in a while

Sometimes

Usually

All the time

1. Did you take all your IPF medicine yesterday?

Yes No

1. People sometimes miss taking their medications for reasons other than forgetting. Thinking over the past two weeks, were there any days on which you did not take your IPF medicine?

Yes No

**Satisfaction**

1. How satisfied are you with your IPF treatment?

1 2 3 4 5 6 7 8 9 10

Not satisfied at all Completely satisfied

**HRQoL on a 0-100 scale**

1. My mobility can be described as:

Perfect Confined

mobility to bed

2. My self-care is:

Trouble Impossible for

free me to handle

3. My usual activities (e.g. work, study, housework, family, or leisure activities) are:

Easy to Impossible to

manage manage

4. My pain can be described as:

No pain Unbearable

pain

5. I would describe my state of mind as:

Normal Extremely anxious

mood or depressed

**Caregiver questionnaire**

**General Demographic Details - Caregiver**

1. Please select your age:

<40 years old

41-50 years old

51-60 years old

61-70 years old

71-80 years old

>81 years old

1. Please select your sex

Male Female Prefer not to say

1. Please select your employment status

Employee

Self-employed

Currently not employed

Retired

1. Do you live with the patient you care for?

Yes No Part time

1. What is your relation to the patient you care for?

Professional carer

Partner/Spouse

Friend

Child

Other

1. How many hours per week do you take care of the person you care for?

Full time  [Dropdown]

**General Clinical Details**

1. How does the person you care for perceive their disease?

Mild Moderate Severe Don’t know

1. How do you perceive the disease of the person you care for?

Mild Moderate Severe Don’t know

I**PF Medication and Other Therapy**

1. Is the person you care for currently taking an antifibrotic medication for their IPF?

Yes No Don’t know

1. [Conditional on 9] For how long has the person you care for been taking their current IPF medicines? [months/years]
2. [Conditional on 9] What IPF medication does the person you care for take)?

Nintedanib 150mg tablets

Nintedanib 100mg tablets

Pirfenidone 267mg tablets

Pirfenidone 534mg tablets

Pirfenidone 801mg tablets

Other (please specify)

Don’t know

1. [Conditional on 9] Who is primarily takes responsibility for organising and ensuring IPF medication is taken correctly?

Yourself (as a carer)

The person that you care for

Other (specify)

1. [Conditional on 12] How difficult is it to ensure they receive the medication correctly?

Very difficult Moderately difficult A little difficult Not difficult

1. What other non-drug therapies does the person you care for receive? Please select (all that apply):

Oxygen therapy

Pulmonary rehabilitation

Nutritional support

Psychological support

Social Worker support

Smoking cessation program

Physical therapy

Don’t know

1. Are you aware of any food or drinks that the person you care for should not consume, due to their IPF medicines? (please specify)

Yes, free text No Don’t know

1. [Conditional on 9, cannot select same answer as 11] Was the person you care for you taking a different antifibrotic medicine for their IPF before their current IPF medication?

No, they did not take any medication before

Nintedanib

Pirfenidone

Other (please specify)

Don’t know

1. [Conditional on 16] Since the person you care for changed their medication, do you feel more competent caring for them/has it been easier to care for them?

Much easier Easier No change Harder Much harder

**Level of information**

1. Were you involved in their choice of IPF medicine?

Yes No

1. How well informed do you feel about the possible treatment options available for the person you care for?

1 2 3 4 5

Not informed at all Very well informed

1. How satisfied are you with this level of information that you have about the current treatment that the person you care for is taking?

1 2 3 4 5

Not satisfied at all Completely satisfied

Or I haven’t received any information

**Side Effects**

1. Is the person you care for experiencing any adverse drug reactions from their current IPF medication?

Yes No

1. Does the person you care for have to limit their exposure to the sun or protect their skin due to their IPF treatment?

Never Sometimes Often

1. Does the person you care for consider taking medications against diarrhoea?

Never Sometimes Often

1. Does the person you care for consider taking medications against nausea/vomiting?

Never Sometimes Often

1. Does the person you care for consider taking medications against heartburn/reflux?

Never Sometimes Often

**Other Medication**

1. What other medication does the person you take care of, take at the moment? [free text field]
2. Does the person you take care of manage to stay up top of this medication?

All the time

Most of the time

Some of the time

Never

Don’t know

**Health-related Quality of Life**

1. Compared with how you felt before the person you care for was diagnosed with IPF, have you:

Become significantly less stressed

Become less stressed

Had no change in stress levels

Become more stressed

Become significantly more stressed

1. In the past 4 weeks, how has being a carer affected your mental wellbeing?

A great deal

A moderate deal

A small deal

No effect on your mental wellbeing

1. In the past 4 weeks, how has being a carer affected your physical wellbeing?

A great deal

A moderate deal

A small deal

No effect on your physical wellbeing

**Pulmonologist questionnaire**

**General Demographic Details - Pulmonologists**

1. Please select your type of practice

Public

Private

Mixture of public and private

1. Can you prescribe IPF treatment at your surgery/centre?

Yes

No

1. Please select how many years of experience you have in management of idiopathic pulmonary fibrosis (IPF)

0 to 5 years

6 to 10 years

Over 11 years

**Experience in IPF and Antifibrotics**

1. On average, around how many new IPF patients do you diagnose per year?

0 to 10 patients

11 to 20 patients

Over 20 patients

1. How many IPF patients in total, on average, do you see per year?

0 to 10 patients

11 to 50 patients

51 to 100 patients

Over 100 patients

1. Approximately what proportion of IPF patients do not receive antifibrotic treatment?

[Dropdown list (10%, 20%, etc)]  Don’t know

1. For individuals who receive anti-fibrotic therapy for their IPF, approximately what proportion get each of the following products?

| *Drug* | *Proportion* |
| --- | --- |
| Nintedanib | [Dropdown (10%, 20% etc)] |
| Pirfenidone | [Dropdown (10%, 20% etc)] |
| Other | [Dropdown (10%, 20% etc)] |
|  | Combined value must sum to 100% |

Don’t know

1. Approximately what proportion of your IPF patients who were initially prescribed nintedanib are now taking pirfenidone?

[Dropdown list (10%, 20%, etc)]  Don’t know

1. Similarly, approximately what proportion of your IPF patients who were initially prescribed pirfenidone are now taking nintedanib?

[Dropdown list (10%, 20%, etc)]  Don’t know

**Patient Profile**

1. Approximately what is the breakdown of predicted forced vital capacity (FVC) scores for your IPF patients?

| *FVC category* | *Proportion* |
| --- | --- |
| < 50% | [Dropdown (10%, 20% etc)] |
| 50% to 90% | [Dropdown (10%, 20% etc)] |
| > 90% | [Dropdown (10%, 20% etc)] |
|  | Combined value must sum to 100% |

Don’t know

1. Approximately what proportion of your IPF patients are on oxygen treatment?

[Dropdown (10%, 20% etc)]  Don’t know

1. Approximately what proportion of your IPF patients participate in pulmonary rehabilitation?

[Dropdown (10%, 20% etc)]  Don’t know

1. Approximately what proportion of your IPF patients smoke?

[Dropdown (10%, 20% etc)]  Don’t know

**Adherence**

1. How would you rate the level of adherence of your IPF patients in general?

Very poor

Poor

Average

Good

Very good

Don’t know

1. What factors do you think impact the level of adherence to medication in your IPF patients in general?

| **Factor** | **Negative impact** | **No impact** | **Positive impact** | **Don’t know** |
| --- | --- | --- | --- | --- |
| Lower health-related quality of life of patient |  |  |  |  |
| Higher level of care needed for patient |  |  |  |  |
| Greater distance from patient's home to treatment centre |  |  |  |  |
| Greater distance from patient's home to pharmacy |  |  |  |  |
| Being male rather than female |  |  |  |  |
| Living in a more rural area |  |  |  |  |
| Being more elderly |  |  |  |  |
| More comorbidities of the patient |  |  |  |  |
| Less well informed the patient is about IPF |  |  |  |  |
| More adverse drug reactions from the medication the patient experiences |  |  |  |  |
| Lower perceived severity of disease by patient |  |  |  |  |
| Living alone rather than with a carer/family member |  |  |  |  |
| More comedications taken |  |  |  |  |
| More frequent dosing schedule (i.e. b.i.d. or t.i.d.) |  |  |  |  |
| Lower coping ability of patient |  |  |  |  |
| Higher length of time on treatment already |  |  |  |  |
| Other (please specify) |  | | | |

**Comorbidities**

1. Approximately what proportion of your IPF patients have each of the following respiratory comorbidities? If you don’t know the answer to a specific event, please write “don’t know”.

| **Comorbidity** | **Proportion of your IPF patients** |
| --- | --- |
| **Pulmonary pathology, for example:**  Asthma  Chronic obstructive pulmonary disease (COPD)  Chronic bronchitis  Pulmonary hypertension  Emphysema   - Other pulmonary comorbidities |  |
| **Cardiovascular, for example:**  Hypertension  Coronary heart disease  Heart failure  Atrial fibrillation  Other cardiovascular comorbidities |  |
| **Mental health, for example:**  Anxiety  Depression |  |
| **Metabolic disease, for example:**  Diabetes  Obesity |  |
| **Other comorbidities, for example:**  Renal impairment  Hepatic impairment  Gastroenterological comorbidities (including dyspepsia, gastroesophageal reflux)  Other comorbidities |  |
| **No comorbidities** |  |

1. What proportion of your IPF patients take each of the following? If you don’t know the answer to a specific event, please write “don’t know”.

| **Molecule** | **% of your IPF patients taking it (or don’t know)** |
| --- | --- |
| **P-gp, (P- glycoprotein) inhibitors/enhancers for example:**  erythromycin  ketoconazole  cyclosporine  rifampicin  carbamazepine  phenytoin  Other |  |
| **CYP-enzymes (especially CYP1A2) inhibitors/enhancers, for example:**  fluvoxamine  omeprazole  rifampicin  enoxacin  ciprofloxacin  amiodarone  propafenone  fluconazole  chloramphenicol  fluoxetine  paroxetine |  |
| Grapefruit juice |  |
| St. John’s Wort |  |

1. Are you confident with your knowledge of the potential drug interactions for IPF medications?

Very confident

Fairly confident

Neutral

Low in confidence

No confidence

1. How do potential drug-drug or drug-food interactions impact your choice of IPF treatment with the patient?

A lot

A bit

Moderately

Little

Very little

1. Are there systems that enable you to identify potential drug interactions for IPF medications?

Alert system when prescribing

Database of drug interactions that can be consulted

Pharmacist warns physicians

No systems in place

Other

**IPF Treatment Adverse Drug Reactions**

Please think about these adverse drug reactions in terms of the maintenance stage of treatment (i.e. not at the start of treatment).

1. **Nausea**

21a. How important is this adverse drug reaction in your decision to prescribe nintedanib for your IPF patients?

Important

Quite important

Neutral

Not very important

Not important

21b. How important is this adverse drug reaction in your decision to prescribe pirfenidone for your IPF patients?

Important

Quite important

Neutral

Not very important

Not important

21c. Do you find that this adverse drug reaction is more likely to be found at the beginning of treatment, is consistent throughout treatment or is more likely to occur suddenly after some time on treatment?

Beginning of treatment

Consistent throughout

Occur suddenly after some time

Don’t know

21d. Approximately what proportion of cases of this adverse drug reaction in your IPF patients would you consider to be of moderate to severe severity?

[Dropdown list (10%, 20%, etc)]  Don’t know

21e. In general, how easy is it to manage these moderate/ severe adverse drug reactions in your IPF patients?

Easy

Quite easy

Quite difficult

Difficult

21f. How would you normally treat moderate to severe presentations of this adverse drug reaction?

Prescribe an additional secondary treatment

Reduce dosage of treatment

Interrupt treatment

Discontinue treatment

Switch treatment

Other (please state)

1. **Photosensitivity (rash)**

22a. How important is this adverse drug reaction in your decision to prescribe nintedanib for your IPF patients?

Important

Quite important

Neutral

Not very important

Not important

22b. How important is this adverse drug reaction in your decision to prescribe pirfenidone for your IPF patients?

Important

Quite important

Neutral

Not very important

Not important

22c. Do you find that this adverse drug reaction is more likely to be found at the beginning of treatment, is consistent throughout treatment or is more likely to occur suddenly after some time on treatment?

Beginning of treatment

Consistent throughout

Occur suddenly after some time

Don’t know

22d. Approximately what proportion of cases of this adverse drug reaction in your IPF patients would you consider to be of moderate to severe severity?

[Dropdown list (10%, 20%, etc)]  Don’t know

22e. In general, how easy is it to manage these moderate/ severe adverse drug reactions in your IPF patients??

Easy

Quite easy

Quite difficult

Difficult

26f. How would you normally treat moderate to severe presentations of this adverse drug reaction (select all that apply)?

Ensure use of sun protection

Reduce sun exposure

Interrupt treatment

Reduce dosage of treatment

Discontinue treatment

Switch treatment

Other (please state)

1. **Diarrhoea**

23a. How important is this adverse drug reaction in your decision to prescribe nintedanib for your IPF patients?

Important

Quite important

Neutral

Not very important

Not important

23b. How important is this adverse drug reaction in your decision to prescribe pirfenidone for your IPF patients?

Important

Quite important

Neutral

Not very important

Not important

23c. Do you find that this adverse drug reaction is more likely to be found at the beginning of treatment, is consistent throughout treatment or is more likely to occur suddenly after some time on treatment?

Beginning of treatment

Consistent throughout

Occur suddenly after some time

Don’t know

27d. Approximately what proportion of cases of this adverse drug reaction in your IPF patients would you consider to be of moderate to severe severity?

[Dropdown list (10%, 20%, etc)]  Don’t know

27e. In general, how easy is it to manage these moderate/ severe adverse drug reactions in your IPF patients??

Easy

Quite easy

Quite difficult

Difficult

27f. How would you normally treat moderate to severe presentations of this adverse drug reaction?

Prescribe an additional secondary treatment

Interrupt treatment

Reduce dosage of treatment

Discontinue treatment

Switch treatment

Other (please state)

**Prescribing Decisions**

1. Would you consider an extended dose titration period for pirfenidone usage in IPF patients who are elderly/ frail or have had an adverse drug reaction?

Yes, in all cases

Yes, in most cases

Yes, in some cases

No

1. How important are these factors in determining your prescribing decision for medicines for an individual with IPF?

| **Factor** | **Important** | **Quite important** | **No difference** | **Not very important** | **Not important** |
| --- | --- | --- | --- | --- | --- |
| The patient’s AST/ALT levels |  |  |  |  |  |
| Potential interaction with concomitant medication for pirfenidone |  |  |  |  |  |
| Potential interaction with concomitant medication for nintedanib |  |  |  |  |  |
| The age of the patient when prescribing pirfenidone |  |  |  |  |  |
| The age of the patient when prescribing nintedanib |  |  |  |  |  |
| The current smoking status of the patient when prescribing pirfenidone |  |  |  |  |  |
| The current smoking status of the patient when prescribing nintedanib |  |  |  |  |  |
| If the patient is in need of a P-gp inhibitor or inducer, or a CYP1A2 inhibitor as part of their general medication regime |  |  |  |  |  |
| The patient’s opinion on treatment options |  |  |  |  |  |
| Patient lifestyle when prescribing nintedanib |  |  |  |  |  |
| Patient lifestyle when prescribing pirfenidone |  |  |  |  |  |
| The level of predicted FVC% when prescribing nintedanib |  |  |  |  |  |
| The level of predicted FVC% when prescribing pirfenidone |  |  |  |  |  |
| The adverse drug reaction profile of either pirfenidone or nintedanib |  |  |  |  |  |
| Need for dose titration with pirfenidone |  |  |  |  |  |

1. When a patient is stable on his/her maintenance antifibrotic treatment but develops renal impairment, do you consider switching treatment?

Never, as the IPF is stable with current antifibrotic

First, I decrease dosage of current medication or momentarily interrupt treatment

Always, I switch antifibrotic treatment

Only from nintedanib to pirfenidone

Only from pirfenidone to nintedanib

Other: please specify

1. When a patient is stable on his/her maintenance antifibrotic treatment but develops hepatic impairment, do you consider switching treatment?

Never, as the IPF is stable with current antifibrotic

First, I decrease dosage of current medication or momentarily interrupt treatment

Always, I switch antifibrotic treatment

Only from nintedanib to pirfenidone

Only from pirfenidone to nintedanib

Other: please specify

1. If an individual is in need of a P-gp inhibitor or inducer, or a CYP1A2 inhibitor as part of their general medication regime, would you consider changing their current medication prescribed for IPF?

Yes No

**General questions**

1. Approximately what proportion of your patients who are initially prescribed antifibrotic treatment are not on any other pharmacological treatment for their IPF? [Dropdown list (10%, 20%, etc)]  Don’t know
2. Does the decision to stop taking any antifibrotic treatment generally come from the patient or the doctor (yourself)?

 Patient  Doctor  Joint decision

1. Please select the two most common reasons why your IPF patients stopped taking any antifibrotic treatment?

Patient perceived they were progressing too fast

Adverse drug reactions

Patient struggled to take antifibrotic due to size of pill

Patient no longer wanted to take the medication

Dosing was too complicated or frequent for patient

Patient was no longer able to pick up treatment

Lung Transplant

Another reason

Don’t know

1. What is the breakdown of level of care needs for your IPF patients?

| *Category* | *Proportion* |
| --- | --- |
| None | [Dropdown (10%, 20% etc)] |
| Informal care (at home) | [Dropdown (10%, 20% etc)] |
| Formal care (at home) | [Dropdown (10%, 20% etc)] |
| Institutional care | [Dropdown (10%, 20% etc)] |
|  | Combined value must sum to 100% |

Don’t know

## Questionnaire Results

**Supplementary Table 1: Patients’ experience taking IPF medication**

| Response | Total | Country | | | | | | | | |
| --- | --- | --- | --- | --- | --- | --- | --- | --- | --- | --- |
| UK | ROI | | France | | Belgium | Netherlands | | Finland |
| **Currently taking IPF medication** | | | | | | | | | | |
| Yes | 80 (79.1) | 17 (77.3) | 1 (50.0) | | 23 (76.7) | | 9 (81.8) | 12 (92.3) | | 18 (78.3) |
| **Current treatment** | | | | | | | | | | |
| Nintedanib 100mg | 14 (17.6) | 3 (17.6) | 0 (0.0) | | 6 (26.1) | | 0 (0.0) | 2 (16.7) | | 3 (17.6) |
| Nintedanib 150mg | 29 (36.7) | 7 (41.2) | 0 (0.0) | | 13 (56.5) | | 0 (0.0) | 4 (33.3) | | 5 (29.4) |
| Pirfenidone 267mg | 7 (8.9) | 1 (5.9) | 1 (100.0) | | 1 (4.3) | | 2 (22.2) | 2 (16.7) | | 0 (0.0) |
| Pirfenidone 534mg | 1 (1.3) | 0 (0.0) | 0 (0.0) | | 0 (0.0) | | 1 (11.1) | 0 (0.0) | | 0 (0.0) |
| Pirfenidone 801mg | 25 (31.6) | 5 (29.4) | 0 (0.0) | | 3 (13.0) | | 6 (66.7) | 4 (33.3) | | 7 (41.2) |
| Other | 3 (3.8) | 1 (5.9) | 0 (0.0) | | 0 (0.0) | | 0 (0.0) | 0 (0.0) | | 2 (11.8) |
| Other: Cortisone | 2 |  |  | |  | |  |  | |  |
| Other:Dexamethasone | 1 |  |  | |  | |  |  | |  |
| **Length of time on current treatment** | | | | | | | | | | |
| Under 6 months | 12 (15.2) | 2 (11.8) | | 0 (0.0) | | 4 (17.4) | 0 (0.0) | | 4 (33.3) | 2 (11.8) |
| 6 to 12 months | 14 (17.7) | 4 (23.5) | | 0 (0.0) | | 4 (17.4) | 0 (0.0) | | 3 (25.0) | 3 (17.6) |
| 13 to 24 months | 13 (16.5) | 3 (17.6) | | 1 (100.0) | | 4 (17.4) | 2 (22.2) | | 3 (25.0) | 0 (0.0) |
| 25 to 36 months | 12 (15.2) | 3 (17.6) | | 0 (0.0) | | 3 (13.0) | 1 (1.11) | | 0 (0.0) | 5 (29.4) |
| Over 3 years | 28 (35.4) | 5 (29.4) | | 0 (0.0) | | 8 (34.8) | 6 (66.7) | | 2 (16.7) | 7 (41.2) |
| **Patient satisfaction with current treatment** | | | | | | | | | | |
| Score (1 to 10*) | **6.3 (2.4)** | 6.1 (2.4) | | 6 (N/A) | | 4.9 (2.6) | 7.1 (2.3) | | 7.6 (1.5) | 7.1 (2.1) |
| **Number of tablets per day** | | | | | | | | | | |
| 1 | 1 (1.3) | 0 (0.0) | | 0 (0.0) | | 0 (0.0) | 0 (0.0) | | 0 (0.0) | 1 (5.9) |
| 2 | 47 (59.5) | 10 (62.5) | | 0 (0.0) | | 20 (87.0) | 1 (11.1) | | 7 (58.3) | 9 (52.9) |
| 3 | 24 (30.4) | 5 (31.3) | | 1 (100.0) | | 2 (8.7) | 6 (66.7) | | 4 (33.3) | 6 (35.3) |
| 4 to 10 | 6 (7.7) | 1 (5.9) | | 0 (0.0) | | 1 (4.3) | 2 (22.2) | | 1 (8.3) | 1 (5.9) |
| Other | 1 (1.3) | 1 (6.3) | | 0 (0.0) | | 0 (0.0) | 0 (0.0) | | 0 (0.0) | 0 (0.0) |
| **Previously taken IPF medication and not currently taking IPF medication** | | | | | | | | | | |
| Yes | 11 (55.0) | 2 (40.0) | 0 (0.0) | | 6 (85.7) | | 1 (50.0) | 0 (0.0) | | 2 (50.0) |
| *1 = lowest satisfaction, 10 = highest satisfaction  Abbreviations: UK, United Kingdom; ROI, Republic of Ireland. | | | | | | | | | | |

**Supplementary Table 2: Medication before current treatment**

|  | Total | Country | | | | |
| --- | --- | --- | --- | --- | --- | --- |
| UK | ROI | France | Netherlands | Finland |
| **Medication taken before current treatment** | | | | | | |
| Nintedanib | 6 (8.6) | 2 (11.8) | 1 (100.0) | 1 (4.3) | 1 (8.3) | 1 (5.9) |
| Pirfenidone | 7 (10.0) | 2 (11.8) | 0 (0.0) | 3 (13.0) | 0 (0.0) | 2 (11.8) |
| No previous medication | 55 (78.6) | 11 (64.7) | 0 (0.0) | 19 (82.6) | 11 (91.7) | 14 (82.4) |
| Other* | 2 (2.9) | 2 (11.8) | 0 (0.0) | 0 (0.0) | 0 (0.0) | 0 (0.0) |
| **Reason for change** | | | | | | |
| Side effects | 9 (45.0) | 3 (42.9) | 1 (50.0) | 4 (66.7) | 1 (100.0) | 0 (0.0) |
| Complicated dosing schedule | 1 (5.0) | 0 (0.0) | 0 (0.0) | 0 (0.0) | 0 (0.0) | 1 (25.0) |
| Pulmonologist decided to change or stop treatment | 2 (10.0) | 0 (0.0) | 1 (50.0) | 0 (0.0) | 0 (0.0) | 1 (25.0) |
| Treatment did not work | 0 (0.0) | 0 (0.0) | 0 (0.0) | 0 (0.0) | 0 (0.0) | 0 (0.0) |
| Struggled to take medication | 1 (5.0) | 0 (0.0) | 0 (0.0) | 1 (16.7) | 0 (0.0) | 0 (0.0) |
| Pulmonologist proposed alternate treatment strategy | 5 (25.0) | 2 (28.6) | 0 (0.0) | 1 (16.7) | 0 (0.0) | 2 (50.0) |
| Other** | 2 (10.0) | 2 (28.6) | 0 (0.0) | 0 (0.0) | 0 (0.0) | 0 (0.0) |
| *Celgene trial 2 years: 1; Methotrexate: 1  ** Fighting against diabetes medication: 1; Trial end disease progression: 1  Abbreviations: UK, United Kingdom; ROI, Republic of Ireland. | | | | | | |

**Supplementary Table 3: Reported non-drug therapies or support received**

| Therapy/Support | Total | Country | | | | | |
| --- | --- | --- | --- | --- | --- | --- | --- |
| UK | ROI | France | Belgium | Netherlands | Finland |
| Oxygen therapy | 34 (22.1) | 14 (42.4) | 0 (0.0) | 7 (15.9) | 5 (20.8) | 3 (17.6) | 5 (14.3) |
| Pulmonary rehabilitation | 25 (16.2) | 7 (21.2) | 0 (0.0) | 5 (11.4) | 6 (25.0) | 0 (0.0) | 7 (20.0) |
| Nutritional support | 15 (9.7) | 1 (3.0) | 0 (0.0) | 3 (6.8) | 3 (12.5) | 2 (11.8) | 6 (17.1) |
| Psychological support | 9 (5.8) | 2 (6.1) | 0 (0.0) | 3 (6.8) | 3 (12.5) | 0 (0.0) | 1 (2.9) |
| Social worker support | 4 (2.6) | 0 (0.0) | 0 (0.0) | 1 (2.3) | 2 (8.3) | 1 (5.9) | 0 (0.0) |
| Smoking cessation program | 0 (0.0) | 0 (0.0) | 0 (0.0) | 0 (0.0) | 0 (0.0) | 0 (0.0) | 0 (0.0) |
| Physical therapy | 22 (14.3) | 0 (0.0) | 0 (0.0) | 10 (22.7) | 2 (8.3) | 8 (47.1) | 2 (5.7) |
| No other support | 29 (18.8) | 6 (18.2) | 1 (100.0) | 11 (25.0) | 0 (0.0) | 3 (17.6) | 8 (22.9) |
| Other | 16 (10.4) | 3 (9.1) | 0 (0.0) | 4 (9.1) | 3 (12.5) | 0 (0.0) | 6 (17.1) |
| Received advice from pulmonologist to avoid certain food or drink | 36 (34.0) | 7 (30.4) | 0 (0.0) | 9 (31.0) | 8 (72.7) | 3 (23.1) | 9 (31.0) |
| Received advice from pulmonologist to avoid certain medication | 27 (26.0) | 8 (34.8) | 0 (0.0) | 4 (13.3) | 7 (77.8) | 4 (33.3) | 4 (13.8) |
| Abbreviations: UK, United Kingdom; ROI, Republic of Ireland. | | | | | | | |

**Supplementary Table 4: Patient source of disease and treatment information**

| Source of information | Total | Country | | | | | |
| --- | --- | --- | --- | --- | --- | --- | --- |
| UK | ROI | France | Belgium | Netherlands | Finland |
| **Source of information when choosing current treatment n (%)** | | | | | | | |
| Pulmonologist | 103 (77.4) | 19 (55.9) | 1 (50.0) | 30 (90.9) | 11 (84.6) | 12 (66.7) | 30 (90.9) |
| Nurse | 13 (9.8) | 7 (20.6) | 0 (0.0) | 1 (3.0) | 0 (0.0) | 4 (22.2) | 1 (3.0) |
| Spouse/partner | 4 (3.0) | 2 (5.9) | 0 (0.0) | 1 (3.0) | 0 (0.0) | 1 (5.6) | 0 (0.0) |
| Family member | 1 (0.8) | 1 (2.9) | 0 (0.0) | 0 (0.0) | 0 (0.0) | 0 (0.0) | 0 (0.0) |
| Friend | 0 (0.0) | 0 (0.0) | 0 (0.0) | 0 (0.0) | 0 (0.0) | 0 (0.0) | 0 (0.0) |
| Patient association | 1 (0.8) | 0 (0.0) | 0 (0.0) | 1 (3.0) | 0 (0.0) | 0 (0.0) | 0 (0.0) |
| Professional caregiver | 0 (0.0) | 0 (0.0) | 0 (0.0) | 0 (0.0) | 0 (0.0) | 0 (0.0) | 0 (0.0) |
| Internet search | 2 (1.5) | 1 (2.9) | 0 (0.0) | 0 (0.0) | 1 (7.7) | 0 (0.0) | 0 (0.0) |
| Other | 9 (6.8) | 4 (11.8) | 1 (50.0) | 0 (0.0) | 1 (7.7) | 1 (5.6) | 2 (6.1) |
| **Source of information about disease and treatment n (%)** | | | | | | | |
| Pulmonologist | 103 (43.6) | 18 (31.6) | 2 (66.7) | 29 (47.5) | 11 (39.3) | 12 (42.9) | 31 (52.5) |
| Nurse | 33 (14.0) | 14 (24.6) | 1 (33.3) | 0 (0.0) | 3 (10.7) | 8 (28.6) | 7 (11.9) |
| Family doctor | 8 (3.4) | 3 (5.3) | 0 (0.0) | 3 (4.9) | 2 (7.1) | 0 (0.0) | 0 (0.0) |
| Patient association | 43 (18.2) | 8 (14.0) | 0 (0.0) | 16 (26.2) | 5 (17.9) | 5 (17.9) | 9 (15.3) |
| Professional caregiver | 5 (2.1) | 1 (1.8) | 0 (0.0) | 0 (0.0) | 0 (0.0) | 1 (3.6) | 3 (5.1) |
| Internet search | 35 (14.8) | 9 (15.8) | 0 (0.0) | 12 (19.7) | 6 (21.4) | 1 (3.6) | 7 (11.9) |
| Other | 9 (3.8) | 4 (7.0) | 0 (0.0) | 1 (1.6) | 1 (3.6) | 1 (3.6) | 2 (3.4) |
| How well-informed patients felt about IPF treatments (1 to 5, low to high) mean (SD) | | | | | | | |
| All treatments | 3.65 (1.12) | 3.65 (1.3) | 3 (1.41) | 3.8 (1.1) | 4 (1.18) | 3.62 (0.77) | 3.84 (0.95) |
| Current treatment | 3.82 (1.19) | 4.09 (1.08) | 2.5 (2.12) | 4.1 (0.96) | 4.55 (1.04) | 4 (0.91) | 3.69 (1.03) |
| Abbreviations: UK, United Kingdom; ROI, Republic of Ireland; SD, standard deviation. | | | | | | | |

**Supplementary Table 5: Importance of factors for prescribing decision between molecules**

| Factor | Total | Country | | | | | |
| --- | --- | --- | --- | --- | --- | --- | --- |
| UK | ROI | France | Belgium | Finland | Greece |
| **Patient’s AST/ALT levels** | | | | | | | |
| Important | 46 (37.4) | 27 (42.2) | 5 (38.5) | 3 (42.9) | 3 (21.4) | 5 (50.0) | 3 (20.0) |
| Quite Important | 53 (43.1) | 26 (40.6) | 4 (30.8) | 4 (57.1) | 6 (42.9) | 3 (30.0) | 10 (66.7) |
| No difference | 13 (10.6) | 8 (12.5) | 1 (7.7) | 0 (0.0) | 3 (21.4) | 1 (10.0) | 0 (0.0) |
| Not very important | 8 (6.5) | 2 (3.1) | 2 (15.4) | 0 (0.0) | 1 (7.1) | 1 (10.0) | 2 (13.3) |
| Not important | 3 (2.4) | 1 (1.6) | 1 (7.7) | 0 (0.0) | 1 (7.1) | 0 (0.0) | 0 (0.0) |
| **Potential interaction with concomitant medication (nintedanib)** | | | | | | | |
| Important | 57 (46.3) | 35 (54.7) | 6 (46.2) | 3 (42.9) | 5 (35.7) | 5 (50.0) | 3 (20.0) |
| Quite Important | 59 (48.0) | 27 (42.2) | 6 (46.2) | 2 (28.6) | 8 (57.1) | 5 (50.0) | 11 (73.3) |
| No difference | 6 (4.9) | 2 (3.1) | 1 (7.7) | 2 (28.6) | 1 (7.1) | 0 (0.0) | 0 (0.0) |
| Not very important | 1 (0.8) | 0 (0.0) | 0 (0.0) | 0 (0.0) | 0 (0.0) | 0 (0.0) | 1 (6.7) |
| Not important | 0 (0.0) | 0 (0.0) | 0 (0.0) | 0 (0.0) | 0 (0.0) | 0 (0.0) | 0 (0.0) |
| **Potential interaction with concomitant medication (pirfenidone)** | | | | | | | |
| Important | 54 (43.9) | 33 (51.6) | 6 (46.2) | 2 (28.6) | 6 (42.9) | 5 (50.0) | 2 (13.3) |
| Quite Important | 60 (48.8) | 27 (42.2) | 6 (46.2) | 5 (71.4) | 6 (42.9) | 4 (40.0) | 12 (80.0) |
| No difference | 4 (3.3) | 2 (3.1) | 0 (0.0) | 0 (0.0) | 2 (14.3) | 0 (0.0) | 0 (0.0) |
| Not very important | 5 (4.1) | 2 (3.1) | 1 (7.7) | 0 (0.0) | 0 (0.0) | 1 (10.0) | 1 (6.7) |
| Not important | 0 (0.0) | 0 (0.0) | 0 (0.0) | 0 (0.0) | 0 (0.0) | 0 (0.0) | 0 (0.0) |
| **Age of patient (pirfenidone)** | | | | | | | |
| Important | 21 (17.1) | 13 (20.3) | 3 (23.1) | 4 (57.1) | 0 (0.0) | 1 (10.0) | 0 (0.0) |
| Quite Important | 55 (44.7) | 30 (46.9) | 6 (46.2) | 2 (28.6) | 7 (50.0) | 4 (40.0) | 6 (40.0) |
| No difference | 39 (31.7) | 19 (29.7) | 4 (30.8) | 1 (14.3) | 5 (35.7) | 4 (40.0) | 6 (40.0) |
| Not very important | 5 (4.1) | 0 (0.0) | 0 (0.0) | 0 (0.0) | 2 (14.3) | 0 (0.0) | 3 (20.0) |
| Not important | 3 (2.4) | 2 (3.1) | 0 (0.0) | 0 (0.0) | 0 (0.0) | 1 (10.0) | 0 (0.0) |
| **Age of patient (nintedanib)** | | | | | | | |
| Important | 20 (16.3) | 11 (17.2) | 3 (23.1) | 4 (57.1) | 0 (0.0) | 1 (10.0) | 1 (6.7) |
| Quite Important | 49 (39.8) | 27 (42.2) | 5 (38.5) | 2 (28.6) | 6 (42.9) | 4 (40.0) | 5 (33.3) |
| No difference | 45 (36.6) | 23 (35.9) | 5 (38.5) | 1 (14.3) | 6 (42.9) | 4 (40.0) | 6 (40.0) |
| Not very important | 7 (5.7) | 1 (1.6) | 0 (0.0) | 0 (0.0) | 2 (14.3) | 1 (10.0) | 3 (20.0) |
| Not important | 2 (1.6) | 2 (3.1) | 0 (0.0) | 0 (0.0) | 0 (0.0) | 0 (0.0) | 0 (0.0) |
| **Smoking status (pirfenidone)** | | | | | | | |
| Important | 26 (21.1) | 12 (18.8) | 5 (38.5) | 1 (14.3) | 6 (42.9) | 1 (10.0) | 1 (6.7) |
| Quite Important | 29 (23.6) | 17 (26.6) | 1 (7.7) | 2 (28.6) | 1 (7.1) | 4 (40.0) | 4 (26.7) |
| No difference | 51 (41.5) | 30 (46.9) | 6 (46.2) | 3 (42.9) | 3 (21.4) | 3 (30.0) | 6 (40.0) |
| Not very important | 7 (5.7) | 1 (1.6) | 0 (0.0) | 1 (14.3) | 1 (7.1) | 1 (10.0) | 3 (20.0) |
| Not important | 10 (8.1) | 4 (6.3) | 1 (7.7) | 0 (0.0) | 3 (21.4) | 1 (10.0) | 1 (6.7) |
| **Smoking status (nintedanib)** | | | | | | | |
| Important | 22 (17.9) | 10 (15.6) | 5 (38.5) | 1 (14.3) | 5 (35.7) | 1 (10.0) | 0 (0.0) |
| Quite Important | 28 (22.8) | 16 (25.0) | 1 (7.7) | 1 (14.3) | 2 (14.3) | 4 (40.0) | 4 (26.7) |
| No difference | 57 (46.3) | 33 (51.6) | 6 (46.2) | 4 (57.1) | 4 (28.6) | 4 (40.0) | 6 (40.0) |
| Not very important | 7 (5.7) | 1 (1.6) | 0 (0.0) | 1 (14.3) | 0 (0.0) | 1 (10.0) | 4 (26.7) |
| Not important | 9 (7.3) | 4 (6.3) | 1 (7.7) | 0 (0.0) | 3 (21.4) | 0 (0.0) | 1 (6.7) |
| **Patient requires P-gp inhibitor or inducer, or a CYP1A2 inhibitor as part of medication regime** | | | | | | | |
| Important | 37 (30.1) | 18 (28.1) | 5 (38.5) | 3 (42.9) | 6 (42.9) | 3 (30.0) | 2 (13.3) |
| Quite Important | 61 (49.6) | 36 (56.3) | 6 (46.2) | 2 (28.6) | 4 (28.6) | 5 (50.0) | 8 (53.3) |
| No difference | 17 (13.8) | 7 (10.9) | 1 (7.7) | 2 (28.6) | 4 (28.6) | 1 (10.0) | 2 (13.3) |
| Not very important | 6 (4.9) | 2 (3.1) | 1 (7.7) | 0 (0.0) | 0 (0.0) | 0 (0.0) | 3 (20.0) |
| Not important | 2 (1.6) | 1 (1.6) | 0 (0.0) | 0 (0.0) | 0 (0.0) | 1 (10.0) | 0 (0.0) |
| **Patient opinion on treatment options** | | | | | | | |
| Important | 65 (52.8) | 45 (70.3) | 8 (61.5) | 3 (42.9) | 4 (28.6) | 3 (30.0) | 2 (13.3) |
| Quite Important | 48 (39.0) | 19 (29.7) | 3 (23.1) | 3 (42.9) | 8 (57.1) | 6 (60.0) | 9 (60.0) |
| No difference | 5 (4.1) | 0 (0.0) | 2 (15.4) | 1 (14.3) | 0 (0.0) | 0 (0.0) | 2 (13.3) |
| Not very important | 3 (2.4) | 0 (0.0) | 0 (0.0) | 0 (0.0) | 1 (7.1) | 1 (10.0) | 1 (6.7) |
| Not important | 2 (1.6) | 0 (0.0) | 0 (0.0) | 0 (0.0) | 1 (7.1) | 0 (0.0) | 1 (6.7) |
| **Patient lifestyle (pirfenidone)** | | | | | | | |
| Important | 54 (43.9) | 38 (59.4) | 7 (53.8) | 2 (28.6) | 2 (14.3) | 3 (30.0) | 2 (13.3) |
| Quite Important | 49 (39.8) | 22 (34.4) | 3 (23.1) | 5 (71.4) | 8 (57.1) | 3 (30.0) | 8 (53.3) |
| No difference | 14 (11.4) | 3 (4.7) | 3 (23.1) | 0 (0.0) | 2 (14.3) | 3 (30.0) | 3 (20.0) |
| Not very important | 5 (4.1) | 1 (1.6) | 0 (0.0) | 0 (0.0) | 1 (7.1) | 1 (10.0) | 2 (13.3) |
| Not important | 1 (0.8) | 0 (0.0) | 0 (0.0) | 0 (0.0) | 1 (7.1) | 0 (0.0) | 0 (0.0) |
| **Patient lifestyle (nintedanib)** | | | | | | | |
| Important | 49 (39.8) | 33 (51.6) | 6 (46.2) | 3 (42.9) | 3 (21.4) | 2 (20.0) | 2 (13.3) |
| Quite Important | 48 (39.0) | 23 (35.9) | 4 (30.8) | 4 (57.1) | 7 (50.0) | 3 (30.0) | 7 (46.7) |
| No difference | 18 (14.6) | 5 (7.8) | 3 (23.1) | 0 (0.0) | 2 (14.3) | 4 (40.0) | 4 (26.7) |
| Not very important | 7 (5.7) | 3 (4.7) | 0 (0.0) | 0 (0.0) | 1 (7.1) | 1 (10.0) | 2 (13.3) |
| Not important | 1 (0.8) | 0 (0.0) | 0 (0.0) | 0 (0.0) | 1 (7.1) | 0 (0.0) | 0 (0.0) |
| **The level of predicted FVC% (nintedanib)** | | | | | | | |
| Important | 47 (38.2) | 36 (56.3) | 4 (30.8) | 2 (28.6) | 1 (7.1) | 3 (30.0) | 1 (6.7) |
| Quite Important | 46 (37.4) | 14 (21.9) | 6 (46.2) | 2 (28.6) | 8 (57.1) | 6 (60.0) | 10 (66.7) |
| No difference | 20 (16.3) | 10 (15.6) | 3 (23.1) | 1 (14.3) | 1 (7.1) | 1 (10.0) | 4 (26.7) |
| Not very important | 6 (4.9) | 1 (1.6) | 0 (0.0) | 2 (28.6) | 3 (21.4) | 0 (0.0) | 0 (0.0) |
| Not important | 4 (3.3) | 3 (4.7) | 0 (0.0) | 0 (0.0) | 1 (7.1) | 0 (0.0) | 0 (0.0) |
| **The level of predicted FVC% (pirfenidone)** | | | | | | | |
| Important | 48 (39.0) | 35 (54.7) | 6 (46.2) | 1 (14.3) | 1 (7.1) | 3 (30.0) | 2 (13.3) |
| Quite Important | 46 (37.4) | 15 (23.4) | 3 (23.1) | 3 (42.9) | 8 (57.1) | 6 (60.0) | 11 (73.3) |
| No difference | 19 (15.4) | 10 (15.6) | 3 (23.1) | 1 (14.3) | 2 (14.3) | 1 (10.0) | 2 (13.3) |
| Not very important | 5 (4.1) | 1 (1.6) | 0 (0.0) | 2 (28.6) | 2 (14.3) | 0 (0.0) | 0 (0.0) |
| Not important | 5 (4.1) | 3 (4.7) | 1 (7.7) | 0 (0.0) | 1 (7.1) | 0 (0.0) | 0 (0.0) |
| **The adverse drug reaction profile (pirfenidone or nintedanib)** | | | | | | | |
| Important | 60 (48.8) | 36 (56.3) | 9 (69.2) | 3 (42.9) | 4 (28.6) | 4 (40.0) | 4 (26.7) |
| Quite Important | 57 (46.3) | 26 (40.6) | 3 (23.1) | 3 (42.9) | 8 (57.1) | 6 (60.0) | 11 (73.3) |
| No difference | 2 (1.6) | 2 (3.1) | 0 (0.0) | 0 (0.0) | 0 (0.0) | 0 (0.0) | 0 (0.0) |
| Not very important | 4 (3.3) | 0 (0.0) | 1 (7.7) | 1 (14.3) | 2 (14.3) | 0 (0.0) | 0 (0.0) |
| Not important | 0 (0.0) | 0 (0.0) | 0 (0.0) | 0 (0.0) | 0 (0.0) | 0 (0.0) | 0 (0.0) |
| **Need for dose titration (pirfenidone)** | | | | | | | |
| Important | 30 (24.4) | 19 (29.7) | 4 (30.8) | 2 (28.6) | 0 (0.0) | 1 (10.0) | 4 (26.7) |
| Quite Important | 53 (43.1) | 26 (40.6) | 4 (30.8) | 2 (28.6) | 8 (57.1) | 6 (60.0) | 7 (46.7) |
| No difference | 23 (18.7) | 12 (18.8) | 4 (30.8) | 2 (28.6) | 2 (14.3) | 1 (10.0) | 2 (13.3) |
| Not very important | 14 (11.4) | 5 (7.8) | 1 (7.7) | 1 (14.3) | 3 (21.4) | 2 (20.0) | 2 (13.3) |
| Not important | 3 (2.4) | 2 (3.1) | 0 (0.0) | 0 (0.0) | 1 (7.1) | 0 (0.0) | 0 (0.0) |

Abbreviations: ALT, alanine transaminase; AST, aspartate transaminase; FVC, forced vital capacity; ROI, Republic of Ireland; UK, United Kingdom.

| **Factor** | **Total** | **Country** | | | | | |
| --- | --- | --- | --- | --- | --- | --- | --- |
| **UK** | **ROI** | **France** | **Belgium** | **Finland** | **Greece** |
| **Renal Impairment** | | | | | | | |
| Never, as condition is stable with current treatment | 15 (12.4) | 4 (6.5) | 3 (23.1) | 1 (14.3) | 5 (35.7) | 2 (20.0) | 0 (0.0) |
| Decrease dose of current medication or interrupt treatment first | 78 (64.5) | 41 (66.1) | 9 (69.2) | 5 (74.1) | 6 (42.9) | 7 (70.0) | 10 (66.7) |
| Always switch treatment | 2 (1.7) | 1 (1.6) | 0 (0.0) | 0 (0.0) | 0 (0.0) | 0 (0.0) | 1 (6.7) |
| Only from nintedanib to pirfenidone | 3 (2.5) | 1 (1.6) | 0 (0.0) | 0 (0.0) | 1 (7.1) | 0 (0.0) | 1 (6.7) |
| Only from pirfenidone to nintedanib | 8 (6.6) | 5 (8.1) | 0 (0.0) | 0 (0.0) | 1 (7.1) | 0 (0.0) | 2 (13.3) |
| Other | 15 (12.4) | 10 (16.1) | 1 (7.7) | 1 (14.3) | 1 (7.1) | 1 (10.0) | 1 (6.7) |
| **Hepatic Impairment** | | | | | | | |
| Never, as condition is stable with current treatment | 5 (4.1) | 1 (1.6) | 0 (0.0) | 1 (14.3) | 1 (7.1) | 1 (10.0) | 1 (6.7) |
| Decrease dose of current medication or interrupt treatment first | 91 (75.2) | 50 (80.6) | 11 (84.6) | 5 (71.4) | 10 (71.4) | 5 (50.0) | 10 (66.7) |
| Always switch treatment | 7 (5.8) | 2 (3.2) | 2 (15.4) | 0 (0.0) | 1 (7.1) | 2 (20.0) | 0 (0.0) |
| Only from nintedanib to pirfenidone | 3 (2.5) | 0 (0.0) | 0 (0.0) | 0 (0.0) | 1 (7.1) | 1 (10.0) | 1 (6.7) |
| Only from pirfenidone to nintedanib | 4 (3.3) | 1 (1.6) | 0 (0.0) | 0 (0.0) | 1 (7.1) | 0 (0.0) | 2 (13.3) |
| Other | 11 (9.1) | 8 (12.9) | 0 (0.0) | 1 (14.3) | 0 (0.0) | 1 (10.0) | 1 (6.7) |

**Supplementary Table 6: HCP preferences for treatment change due to comorbidity when patient is table on antifibrotic treatment**

Abbreviations: ROI, Republic of Ireland; UK, United Kingdom.

**Supplementary Table 7: Patients’ experiences with adverse events**

| Question/ Response | Whole sample | UK | ROI | France | Belgium | Netherlands | Finland |
| --- | --- | --- | --- | --- | --- | --- | --- |
| **Did the participant experience an adverse event?** | | | | | | | |
| Yes | 61 (78.2) | 12 (70.6) | 1 (100.0) | 20 (87.0) | 7 (77.8) | 7 (63.6) | 14 (82.4) |
| **Does the participant limit their exposure to the sun to protect their skin due to IPF?** | | | | | | | |
| Never | 37 (47.4) | 10 (58.8) | 0 (0.0) | 15 (65.2) | 0 (0.0) | 3 (27.3) | 9 (52.9) |
| Sometimes | 16 (20.5) | 3 (17.6) | 0 (0.0) | 3 (13.0) | 4 (44.4) | 3 (27.3) | 3 (17.6) |
| Often | 25 (32.1) | 4 (23.5) | 1 (100.0) | 5 (21.7) | 5 (55.6) | 5 (45.5) | 5 (29.4) |
| **Does the participant consider taking the medication against diarrhoea?** | | | | | | | |
| Never | 35 (44.9) | 7 (41.2) | 0 (0.0) | 4 (17.4) | 7 (77.8) | 9 (81.8) | 8 (47.1) |
| Sometimes | 27 (34.6) | 8 (47.1) | 1 (100.0) | 11 (47.8) | 2 (22.2) | 1 (9.1) | 4 (23.5) |
| Often | 16 (20.5) | 2 (11.8) | 0 (0.0) | 8 (34.8) | 0 (0.0) | 1 (9.1) | 5 (29.4) |
| **Does the participant consider taking the medication against nausea/vomiting?** | | | | | | | |
| Never | 51 (65.4) | 9 (52.9) | 0 (0.0) | 16 (69.6) | 4 (44.4) | 10 (90.9) | 12 (70.6) |
| Sometimes | 20 (25.6) | 4 (23.5) | 0 (0.0) | 7 (30.4) | 3 (33.3) | 1 (9.1) | 5 (29.4) |
| Often | 7 (9.0) | 4 (23.5) | 1 (100.0) | 0 (0.0) | 2 (22.2) | 0 (0.0) | 0 (0.0) |
| **Does the participant consider taking the medication against heartburn?** | | | | | | | |
| Never | 21 (26.9) | 4 (23.5) | 1 (100.0) | 7 (30.4) | 0 (0.0) | 3 (27.3) | 6 (35.3) |
| Sometimes | 20 (25.6) | 2 (11.8) | 0 (0.0) | 4 (17.4) | 4 (44.4) | 2 (18.2) | 8 (47.1) |
| Often | 37 (47.4) | 11 (64.7) | 0 (0.0) | 12 (52.2) | 5 (55.6) | 6 (54.5) | 3 (17.6) |
| **How many hours per day on average does the participant spend outside?** | | | | | | | |
| Less than 1 hour | 33 (29.7) | 11 (47.8) | 0 (0) | 7 (23.3) | 5 (45.5) | 3 (23.1) | 7 (21.9) |
| 1 to 3 hours | 64 (57.7) | 12 (52.2) | 1 (50.0) | 19 (63.3) | 4 (36.4) | 9 (69.2) | 19 (59.4) |
| Over 3 hours | 14 (12.6) | 0 (0) | 1 (50.0) | 4 (13.3) | 2 (18.2) | 1 (7.7) | 6 (18.8) |
| **In the past 4 weeks, how often has shortness of breath prevented the participant from doing things?** | | | | | | | |
| Not at all | 22 (19.8) | 1 (4.3) | 1 (50.0) | 5 (16.7) | 1 (9.1) | 4 (30.8) | 10 (31.3) |
| Sometimes | 42 (37.8) | 7 (30.4) | 0 (0.0) | 15 (50.0) | 4 (36.4) | 6 (46.2) | 10 (31.3) |
| Often | 27 (24.3) | 9 (39.1) | 1 (50.0) | 7 (23.3) | 4 (36.4) | 1 (7.7) | 5 (15.6) |
| All the time | 20 (18.0) | 6 (26.1) | 0 (0.0) | 3 (10.0) | 2 (18.2) | 2 (15.4) | 7 (21.9) |
| **How often has coughing prevented the participant from doing things?** | | | | | | | |
| Not at all | 43 (38.7) | 6 (26.1) | 1 (50.0) | 17 (56.7) | 0 (0.0) | 8 (61.5) | 11 (34.4) |
| Sometimes | 42 (37.8) | 10 (43.5) | 1 (50.0) | 7 (23.3) | 9 (81.8) | 4 (30.8) | 11 (34.4) |
| Often | 21 (18.9) | 5 (21.7) | 0 (0.0) | 5 (16.7) | 1 (9.1) | 1 (7.7) | 9 (28.1) |
| All the time | 5 (4.5) | 2 (8.7) | 0 (0.0) | 1 (3.3) | 1 (9.1) | 0 (0.0) | 1 (3.1) |

Abbreviations: ROI, Republic of Ireland; UK, United Kingdom.

**Supplementary Table 8: Adherence to treatment (Patient)**

| Question/ Response n (%) | Whole sample | UK | ROI | France | Belgium | Netherlands | Finland |
| --- | --- | --- | --- | --- | --- | --- | --- |
| **Does the participant sometimes forget to take their medication?** | | | | | | | |
| Yes | 20 (19.0) | 4 (17.4) | 1 (100.0) | 7 (24.1) | 1 (9.1) | 0 (0.0) | 7 (23.3) |
| **Has the participant decided not to take their medication over the past two weeks?** | | | | | | | |
| Yes | 16 (15.2) | 2 (8.7) | 1 (100.0) | 5 (17.2) | 1 (9.1) | 4 (36.4) | 3 (10.0) |
| **Does the participant sometimes forget to bring their medication with them when they travel or leave home?** | | | | | | | |
| Yes | 7 (6.7) | 2 (8.7) | 0 (0.0) | 3 (10.3) | 0 (0.0) | 1 (9.1) | 1 (3.3) |
| **Did the participant take all of their medication yesterday?** | | | | | | | |
| Yes | 90 (85.7) | 19 (82.6) | 0 (0.0) | 21 (72.4) | 11 (100.0) | 10 (90.9) | 29 (96.7) |
| **Does the participant stop taking their medication when their symptoms are under control?** | | | | | | | |
| Yes | 1 (1.0) | 0 (0.0) | 1 (100.0) | 0 (0.0) | 0 (0.0) | 0 (0.0) | 0 (0.0) |
| **Does the participant consider sticking to their treatment plan to be a hassle?** | | | | | | | |
| Yes | 23 (21.9) | 7 (30.4) | 1 (100.0) | 1 (3.4) | 3 (27.3) | 3 (27.3) | 8 (26.7) |
| **Does the participant have difficulty remembering to take all of their medication?** | | | | | | | |
| Never/Rarely | 82 (78.1) | 17 (73.9) | 1 (100.0) | 23 (79.3) | 7 (63.6) | 7 (63.6) | 27 (90.0) |
| Once in a while | 17 (16.2) | 5 (21.7) | 0 (0.0) | 5 (17.2) | 3 (27.3) | 3 (27.3) | 1 (3.3) |
| Sometimes | 6 (5.7) | 1 (4.3) | 0 (0.0) | 1 (3.4) | 1 (9.1) | 1 (9.1) | 2 (6.7) |
| Usually | 0 (0.0) | 0 (0.0) | 0 (0.0) | 0 (0.0) | 0 (0.0) | 0 (0.0) | 0 (0.0) |
| All the time | 0 (0.0) | 0 (0.0) | 0 (0.0) | 0 (0.0) | 0 (0.0) | 0 (0.0) | 0 (0.0) |

Abbreviations: UK, United Kingdom; ROI, Republic of Ireland.
